# Supplementary material for: Development of Antimicrobial Defined Daily Dose (DDD) for the Pediatric Population
Source: MDPI journal article supplement (doi:10.3390/antibiotics12020276), 2023-01-31
Supplement: s1 [file s1]

**Supplementary File 1.**

**Table S1.** Pediatric DDD

| ANTIMICROBIALS          | FINAL DDD (g/day) |      |
|-------------------------|-------------------|------|
|                         | Intravenous       | Oral |
| AMIKACIN                | 0.26              | -    |
| AMOXICILLIN             | -                 | 0.85 |
| AMOXICILLIN-CLAVULANIC  | 1.71              | 0.9  |
| AMPHOTERICIN B LIPO     | 0.08              | -    |
| AMPICILLIN              | 1.71              | -    |
| AZITHROMYCIN            | 0.17              | 0.17 |
| CEFAZOLIN               | 2                 | -    |
| CEFEPIME                | 3                 | -    |
| CEFIXIME                | -                 | 0.14 |
| CEFOTAXIME              | 2.56              | -    |
| CEFTAZIDIME             | 2.56              | -    |
| CEFTRIAXONE             | 1.4               | -    |
| CEFUROXIME              | -                 | 0.5  |
| CIPROFLOXACIN           | 0.6               | 0.5  |
| CLARITHROMYCIN          | -                 | 0.36 |
| CLINDAMYCIN             | 0.74              | -    |
| CLOXACILLIN             | 3.5               | 1.71 |
| DAPTOMYCIN              | 0.14              | -    |
| ERYTHROMYCIN            | 1.1               | 0.68 |
| FLUCONAZOLE             | 0.1               | 0.1  |
| GENTAMICIN              | 0.14              | -    |
| IMIPENEM/CILASTATIN     | -                 | -    |
| LEVOFLOXACIN            | 0.34              | 0.26 |
| LINEZOLID               | 0.51              | 0.51 |
| MEROPENEM               | 1.02              | -    |
| METRONIDAZOLE           | 0.9               | 0.51 |
| MICAFUNGIN              | 0.03              | -    |
| PIPERACILLIN-TAZOBACTAM | 5.12              | -    |
| TEICOPLANIN             | 0.17              | -    |
| TOBRAMYCIN              | 0.15              | -    |
| VANCOMYCIN              | 0.76              | -    |
